# Supplementary material
Source: publisher site journal article supplement (https://www.dovepress.com/article/400264)

**Appendix 1.**

Name of opioids drug and product used in analyses.

| Product Name | Drug |
| --- | --- |
| ACETAMINOPHEN-CODEINE PHOSPHATE | Codeine |
| ACETAMINOPHEN-PROPOXYPHENE HCL | Propoxyphene |
| ACETAMINOPHEN-PROPOXYPHENE NAPSYLATE | Propoxyphene |
| ACETAMINOPHEN/CODEINE #3 | Codeine |
| ASCOMP W/CODEINE | Codeine |
| AVINZA | Morphine LA |
| BUPRENORPHINE HYDROCHLORIDE | Buprenorphine |
| BUPRENORPHINE-NALOXONE | Buprenorphine |
| BUTALBITAL-APAP-CAFFEINE-CODEINE | Codeine |
| BUTALBITAL/ASPIRIN/CAFFEINE/CODEINE | Codeine |
| BUTORPHANOL TARTRATE | Butorphanol |
| BUTRANS | Buprenorphine |
| CAPITAL W/CODEINE | Codeine |
| CARISOPRODOL/ASPIRIN/CODEINE | Codeine |
| CODEINE SULFATE | Codeine |
| DARVOCET-N 100 | Propoxyphene |
| DILAUDID | Hydromorphone SA |
| DURAGESIC | Fentanyl LA |
| EMBEDA | Morphine LA |
| ENDOCET | Oxycodone SA |
| EXALGO | Hydromorphone LA |
| FENTANYL | Fentanyl LA |
| FENTANYL CITRATE | Fentanyl SA |
| FENTANYL TRANSDERMAL SYSTEM | Fentanyl LA |
| HYDROCODONE BITARTRATE-ACETAMINOPHEN | Hydrocodone SA |
| HYDROCODONE BITARTRATE-IBUPROFEN | Hydrocodone SA |
| HYDROMORPHONE HCL | Hydromorphone LA |
| HYDROMORPHONE HCL | Hydromorphone SA |
| HYSINGLA ER | Hydrocodone LA |
| KADIAN | Morphine LA |
| LORCET 10/650 | Hydrocodone SA |
| LORTAB 10/500 | Hydrocodone SA |
| LORTAB 5/500 | Hydrocodone SA |
| LORTAB 7.5/500 | Hydrocodone SA |
| MAXIDONE | Hydrocodone SA |
| MEPERIDINE HCL | Meperidine |
| MEPERITAB | Meperidine |
| METHADONE HCL | Methadone |
| MORPHINE SULFATE | Morphine LA |
| MORPHINE SULFATE | Morphine SA |
| MORPHINE SULFATE ER | Morphine LA |
| NORCO | Hydrocodone SA |
| NUCYNTA | Tapentadol SA |
| NUCYNTA ER | Tapentadol LA |
| OPANA | Oxymorphone SA |
| OPANA ER | Oxymorphone LA |
| ORAL TRANSMUCOSAL FENTANYL CITRATE | Fentanyl SA |
| ORAMORPH SR | Morphine LA |
| OXY IR | Oxycodone SA |
| OXYCODONE HCL | Oxycodone LA |
| OXYCODONE HCL | Oxycodone SA |
| OXYCODONE HCL-ACETAMINOPHEN | Oxycodone SA |
| OXYCODONE HCL-ASPIRIN | Oxycodone SA |
| OXYCONTIN | Oxycodone LA |
| OXYMORPHONE HCL | Oxymorphone LA |
| OXYMORPHONE HCL | Oxymorphone SA |
| PENTAZOCINE HCL-ACETAMINOPHEN | Pentazocine |
| PENTAZOCINE HCL-NALOXONE HCL | Pentazocine |
| PERCOCET | Oxycodone SA |
| PROPOXYPHENE HCL | Propoxyphene |
| PROPOXYPHENE NAPSYLATE/ACETAMINOPHEN | Propoxyphene |
| REPREXAIN | Hydrocodone SA |
| ROXICET | Oxycodone SA |
| ROXICODONE | Oxycodone SA |
| RYZOLT | Tramadol LA |
| SUBOXONE | Buprenorphine |
| TRAMADOL HCL | Tramadol LA |
| TRAMADOL HCL | Tramadol SA |
| TRAMADOL HCL/ACETAMINOPHEN | Tramadol SA |
| TYLENOL W/CODEINE #3 | Codeine |
| TYLENOL WITH CODEINE | Codeine |
| TYLENOL WITH CODEINE NO. 3 | Codeine |
| ULTRACET | Tramadol SA |
| ULTRAM | Tramadol SA |
| ULTRAM ER | Tramadol LA |
| VICODIN | Hydrocodone SA |
| VICODIN ES | Hydrocodone SA |
| VICODIN HP | Hydrocodone SA |
| XARTEMIS XR | Oxycodone LA |
| XODOL | Hydrocodone SA |
| ZOHYDRO ER | Hydrocodone LA |

Table created from National Center for Injury Prevention and Control. CDC compilation of benzodiazepines, muscle relaxants, stimulants, zolpidem, and opioid analgesics with oral morphine milligram equivalent conversion factors, 2017 version. Atlanta, GA: Centers for Disease Control and Prevention; 2017. Previously available at [https://www.cdc.gov/drugoverdose/resources/data.html](https://urldefense.com/v3/__https:/www.cdc.gov/drugoverdose/resources/data.html__;!!GobTDDpD7A!ctuvkuoh0K8PL4YUPsrRBRHUeJUxan_SDkWDqYjr4trHE3fkGfn_K82bp-iZ7rFj$)

**Appendix 2.**

Associations between patient characteristics and emergency department visits and hospitalizations.

|  | **Emergency Department visits** | **Hospitalizations** |
| --- | --- | --- |
| Variable | Rate ratio (RR) and 95% CI | Rate ratio (RR) and 95% CI |
| Intercept | 0.75 (0.60,0.95) | 0.44 (0.35,0.57) |
| Age | 1.00 (0.99,1.00) | 0.99 (0.98,0.99) |
| Outpatient visit | 1.01 (1.01,1.02) | 1.01 (1.01,1.02) |
| Sex (ref = Male) | | |
| Female | 1.07 (0.97,1.19) | 0.58 (0.48,0.71) |
| Race (ref = White) | | |
| Black, non-Hispanic | 1.16 (1.08,1.24) | 1.03 (0.94,1.14) |
| Others= race, non-Hispanic | 0.84 (0.70,1.00) | 0.86 (0.73,1.02) |
| Hispanic | 0.84 (0.77,0.93) | 0.97 (0.88,1.08) |
| Feeling down (ref= All or most of the time) | | |
| Some of the time | 0.86 (0.79,0.94) | 0.82 (0.71,0.95) |
| Little or none of the time | 0.63 (0.57,0.69) | 0.67 (0.60,0.76) |
| Family Income to Poverty Line (ref = Negative or poor) | | |
| Near poor | 0.94 (0.82,1.06) | 0.93 (0.78,1.11) |
| Low income | 0.93 (0.83,1.05) | 0.99 (0.85,1.16) |
| Middle income | 0.73 (0.66,0.82) | 0.86 (0.74,0.99) |
| High income | 0.65 (0.58,0.74) | 0.82 (0.70,0.95) |
| Current Smoking status (ref = Smoking) | | |
| Non-smoking | 0.87 (0.81,0.93) | 1.02 (0.93,1.12) |
| Physical activity (ref= Active) | | |
| Not active | 1.13 (1.05,1.21) | 1.27 (1.17,1.38) |
| Health insurance (ref = Any private) | | |
| Public only | 1.42 (1.26,1.59) | 1.63 (1.43,1.87) |
| Uninsured | 1.02 (0.95,1.10) | 0.65 (0.57,0.75) |

**Appendix 3.**

The associations between factors and Emergency Department visits in comparison with those between factors and hospitalizations, using the US Medical Expenditure Panel Survey, 2010–2015


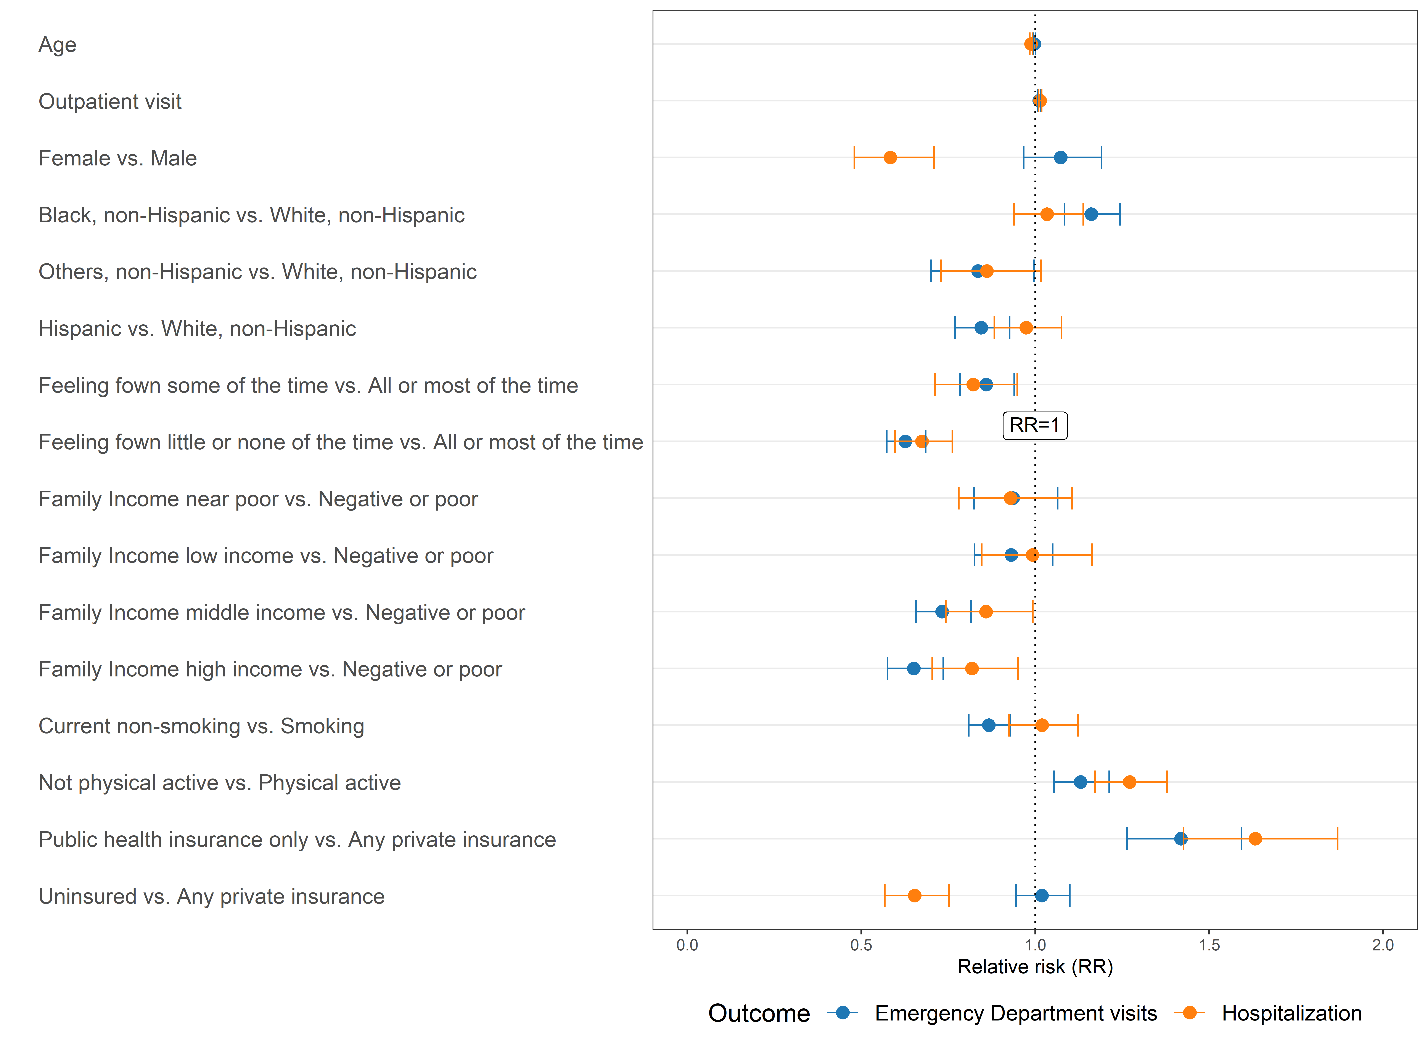

Supplement: Supplementary file 1 [file get_supplementary_file.php]
